# Supplementary material for: The association between antiphospholipid syndrome and atrial fibrillation: a single center retrospective case-control study
Source: PeerJ. 2024 Jun 26;12:e17617. doi: 10.7717/peerj.17617 (PMC11214423; doi:10.7717/peerj.17617)
Supplement: Data S1 [file peerj-12-17617-s001.xlsx]

## Sheet: Sheet1
No	aps（Yes=1;No=0）	Age (y)	Age (y)（＜60=0 ≥60=1）	Gender(male=1,female=0)	Alcohol(Yes=1;No=0)	Smoking(Yes=1;No=0)	BMI (kg/m2)	BMI (kg/m2)（＜28=0 ≥28=1）	TnI（pg/ml）	TnI（pg/ml）(＜10.4=0，≥10.4=1)	BNP（pg/ml）	BNP（pg/ml）（＜100=0，≥100=1）	acL（RU/ml negative=0 positive=1）	anti-β2GP1（RU/mlnegative=0 positive=1）	LA(negative=0 positive=1）	PT（s）（normal=0 abnormal=1）	PTA(%)(normal=0 abnormal=1)	INR（normal=0 abnormal=1）	APTT（s）（normal=0 abnormal=1）	D-dimer (ng/ml)（normal=0 ＞243=1）	WBC（/L）（normal=0 abnormal=1）	NE(/L)（normal=0 abnormal=1）	Hb（g/L）（normal=0 abnormal=1）	PLT（/L）（normal=0 abnormal=1）	Cholesterol (mmol/L)（normal=0 abnormal=1）	TG（mmol/L）（normal=0 abnormal=1）	LDL cholesterol（mmol/L）（normal=0 abnormal=1）	HDL cholesterol（mmol/Lnormal=0 abnormal=1）	Fasting blood-glucose(mmol/L)	Creatinine (umol/L)（normal=0 abnormal=1）	eGFR(ml/min*1.73m2)（normal=0 ＜90=1）	Mb (ng/ml)（normal=0 abnormal=1）	TnI（ng/ml）（normal=0 abnormal=1）	CK-MB（ng/ml）（normal=0 abnormal=1）	NT-proBNP(pg/ml=ng/L)	BNP(pg/ml)（normal=0 abnormal=1）	CRP(mg/L)（normal=0 abnormal=1）	Thrombosis(Yes=1；No=0)	Atrial fibrillation(Yes=1;No=0)	Atrial fibrillation（ New-currence=1;Paroxysmal=2Persistent=3Permanent=4）	cerebral infarction (CI)(Yes=1;No=0)	the assosiation with CI（before CI=1；after CI=2）	Length of time from AF to CI（month）	Heart failure（Yes=1；No=0）	NYHA grade	Coronary heart disease（Yes=1；No=0）	Hypertension（Yes=1；No=0）	Diabetes mellitus（Yes=1；No=0）	Chronic kidney disease（Yes=1；No=0）
	1	72	1	0	0	0	27.61	0	6.7	0	10	0	0	1	1	0	0	0	1	1	1	0	1	1	0	0	0	0	5.49	0	1	0	0	0		1	0	0	1	2	1	2		0		0	0	0	0
	0	75	1	0	1	1	25.98	0	5.4	0	26	0	1	0	0	1	0	1	0	1	1	1	1	0	1	0	1	0	14.9	0	0	0	0	0		1	1	1	0		0			0		0	1	0	0
	1	58	0	0	0	0	17.81	0	8.2	0	71	0	0	1	1	1	0	1	0	0	0	0	1	0	0	0	0	0	3.73	0	0	1	0	0		0	1	1	1	2	1	2		0		0	0	0	0
	1	71	1	1	0	0	27.43	0	9.6	0	90	0	1	1	0	0	0	0	0	1	0	0	0	0	0	0	0	0	4.94	1	1	0	0	0	197.9	0	1	1	0		1			0		0	0	0	0
	1	68	1	0	0	0	24.15	0	3.5	0	43	0	0	1	1	1	0	1	0	1	1	1	1	1	0	0	0	1	5.38	0	0	0	0	0		1	1	1	1	2	0			0		0	1	0	0
	1	65	1	0	0	0	25.61	0	2.8	0	82	0	1	0	0	0	0	0	0	1	1	1	1	1	0	0	0	1	5.99	0	0	0	0	0		1	1	1	1	2	1	2		0		0	1	0	0
	1	63	1	0	0	0	25.18	0	5.1	0	16	0	1	1	1	0	0	0	0	1	0	0	1	1	1	1	0	0		0	1	0	0	0		0	0	1	1	2	0			0		0	0	0	0
	1	48	0	1	0	1	21.24	0	4.9	0	15	0	1	1	1	0	0	0	0	0	1	1	1	1	0	0	0	1		0	0	0	0	0		0	0	1	1	2	0			0		0	0	0	0
	1	66	1	0	0	0	25.61	0	6.2	0	29	0	0	0	1	1	0	0	1	1	0	0	1	0	0	0	0	1		0	1	0	0	0		0	1	0	1	2	0			0		0	0	0	0
	1	78	1	0	1	1	24.81	0	3.9	0	80	0	1	1	1	0	0	0	1	1	0	0	1	1	0	1	0	1		1	1	1	1	0		1	1	1	1	2	0			0		0	1	0	0
	1	57	0	0	0	0	24.19	0	6.2	0	74	0	1	0	0	0	0	0	1	0	0	0	0	0	0	0	0	0		0	0	0	0	0		0	0	0	1	2	0			0		0	0	1	0
	1	69	1	1	1	1	24.02	0	5.1	0	53	0	0	0	0	0	0	0	1	0	0	0	1	1	0	0	0	0		0	0	0	0	0		0	1	0	1	2	0			0		0	1	1	0
	1	61	1	1	0	0	20.17	0	8.4	0	26	0	0	1	1	1	1	1	1	1	0	0	1	1	0	0	0	0		1	1	1	1	0		1	1	1	1	2	0			0		0	1	0	0
	1	62	1	1	1	1	27.61	0	3.7	0	48	0	0	1	1	1	1	1	1	0	0	0	0	1	0	0	0	1		1	0	0	0	0		0	0	1	1	2	0			0		0	1	1	0
	1	72	1	0	1	0	21.34	0	9	0	39	0	0	0	0	1	0	0	0	0	1	0	1	1	0	0	0	0		1	0	0	0	0		0	0	0	1	2	0			0		0	0	0	1
	0	49	0	0	1	0	22.9	0	4.1	0	35	0	0	0	0	0	0	1	0	0	1	0	0	0	0	1	0	0		0	0	1	0	0		1	0	0	1	2	1	2		1		0	0	0	0
	0	65	1	0	0	1	26.76	0	11.2	1	103	1	1	0	0	0	0	0	0	0	0	1	0	0	0	0	0	0		0	0	0	0	0		0	0	0	1	2	0			0		0	0	0	0
	1	79	1	0	1	0	25.13	0	5.2	0	26	0	0	0	0	1	0	0	0	0	0	1	0	1	0	0	0	0		1	0	0	0	0		0	0	0	1	2	0			0		0	0	0	1
	0	47	0	0	0	0	26.71	0	6.9	0	24	0	0	0	0	0	0	0	0	0	1	0	0	0	0	0	0	0		0	0	0	0	0		0	0	0	1	2	0			0		0	0	0	0
	0	66	1	0	1	1	20.87	0	7.1	0	73	0	1	0	0	0	0	0	1	0	0	1	0	0	0	0	1	0		0	0	0	1	0		0	1	0	1	2	0			0		0	0	0	0
	0	46	0	0	1	1	26.12	0	4.5	0	80	0	0	0	0	0	0	0	1	1	0	1	1	0	0	0	0	0		0	1	0	0	0		0	0	1	1	2	0			0		0	1	0	0
	0	69	1	0	0	0	25.31	0	8	0	46	0	1	0	0	0	0	0	0	0	1	0	0	0	0	0	0	0		0	0	0	0	0		0	0	0	1	2	0			0		0	0	0	0
	0	37	0	1	1	1	20.4	0	2.6	0	50	0	0	0	0	0	0	0	1	0	0	1	0	0	0	0	1	0		0	0	0	1	0		0	1	0	1	2	0			0		0	0	0	0
	0	60	1	0	0	0	25.17	0	7.3	0	30	0	1	0	0	0	0	0	0	0	0	0	0	0	0	0	0	0		1	0	0	0	0		0	0	0	1	2	0			0		0	0	0	0
	0	59	0	1	1	1	23.28	0	2.9	0	28	0	0	0	0	0	0	0	0	0	1	0	0	0	0	1	0	0		1	0	1	0	0		1	0	0	1	2	1	2		1		0	0	0	0
	1	69	1	0	0	0	27.45	0	8.6	0	39	0	0	1	0	1	0	0	0	0	0	0	0	0	0	0	0	0		0	0	0	0	0		0	0	0	1	2	0			0		0	0	0	1
	0	70	1	0	0	0	20.96	0	5.3	0	31	0	1	0	0	0	0	0	0	0	0	0	0	0	0	0	0	0		1	0	0	0	0		0	0	0	1	2	0			1		0	1	0	0
	0	58	0	1	0	0	24.37	0	8.3	0	25	0	0	1	0	0	0	0	0	0	0	0	0	0	0	0	0	0		1	0	0	0	0		0	0	0	1	2	0			0		0	0	0	0
	0	79	1	1	1	1	20.71	0	6.5	0	61	0	0	0	0	0	0	0	0	0	0	0	0	0	0	0	0	0		0	0	0	0	0		0	0	0	1	2	0			0		0	0	0	0
	0	53	0	1	1	1	23.16	0	2.1	0	23	0	0	0	0	0	0	0	0	0	0	0	0	0	0	1	0	0		1	0	1	0	0		1	0	0	1	2	1	2		1		0	0	0	0
	1	72	1	0	1	0	24.17	0	9	0	46	0	0	0	0	0	0	0	1	1	1	1	1	0	0	0	1	1		0	0	0	1	1		0	1	0	1	2	0			0		0	0	0	0
	0	73	1	0	1	0	26.41	0	7	0	71	0	0	1	0	0	0	0	1	1	1	1	1	0	0	0	1	1		0	1	0	1	1		0	1	1	1	2	0			0		0	0	0	0
	0	43	0	0	0	0	25.81	0	9.3	0	79	0	0	0	0	0	0	0	0	0	0	0	0	0	0	0	0	0		0	0	0	0	0		0	0	0	1	2	0			0		0	0	0	0
	0	75	1	0	1	0	25.46	0	3	0	75	0	1	0	0	0	0	0	1	0	0	1	0	0	0	0	0	0		0	0	0	0	0		0	0	0	1	2	0			0		0	0	0	0
	0	44	0	1	0	1	23.61	0	9	0	82	0	0	0	0	1	0	0	0	0	0	0	0	0	0	0	0	0		0	0	0	0	0		0	0	0	1	2	0			0		0	0	0	1
	0	39	0	0	0	0	26.13	0	3.4	0	91	0	0	0	0	1	0	1	0	0	0	0	0	0	0	1	0	0		0	0	1	0	0		1	0	0	1	2	1	2		0		0	0	0	1
	0	56	0	1	0	0	24.13	0	5.3	0	52	0	0	1	0	0	0	1	0	1	1	0	1	0	0	1	0	1		0	0	1	0	1		1	0	1	1	2	1	2		1		0	0	0	0
	0	68	1	0	0	0	22.71	0	3.2	0	30	0	0	0	0	0	0	0	0	1	1	0	1	0	0	0	0	1		1	0	0	0	1		0	0	1	1	2	0			0		0	0	0	0
	0	47	0	1	0	1	26.55	0	4.8	0	27	0	1	0	0	1	0	1	0	0	0	0	0	0	0	1	0	0		1	0	1	0	0		1	0	0	1	2	1			0		0	0	0	1
	0	61	1	0	1	0	24.8	0	7.3	0	96	0	0	0	0	0	0	0	0	1	1	0	1	0	0	0	0	1		0	0	0	0	1		0	0	0	1	2	0			0		0	0	0	0
	0	67	1	1	1	0	26.71	0	2.5	0	92	0	0	0	0	0	0	0	0	0	0	0	0	0	0	0	0	0		1	0	0	0	0		0	0	0	1	2	0			0		0	0	0	0
	0	33	0	0	0	1	21.91	0	3.6	0	53	0	1	0	0	0	0	0	0	0	0	0	0	0	0	0	0	0		0	1	0	0	0		0	0	0	1	2	0			0		0	0	0	0
	0	64	1	1	0	0	25.62	0	9.1	0	50	0	0	1	0	0	0	0	0	0	0	0	0	0	0	0	0	0		0	0	0	0	0		0	0	0	1	2	0			0		0	0	0	0
	0	75	1	0	0	1	29.6	1	8.2	0	80	0	0	0	0	0	0	0	0	0	0	0	0	0	0	0	0	0		0	0	0	0	0		0	0	0	1	2	0			0		0	1	0	0
	0	36	0	1	0	0	25.73	0	4.6	0	21	0	0	0	0	0	0	0	0	0	0	0	0	0	0	0	0	0		0	0	0	0	0		0	0	0	1	2	0			0		0	0	0	0
	0	45	0	0	1	1	17.92	0	5.9	0	30	0	0	0	0	0	0	0	0	0	0	0	0	0	0	0	0	0		0	0	0	0	0		0	0	0	1	2	0			0		1	0	0	0
	0	72	1	1	0	0	28.72	1	7.4	0	72	0	0	0	0	1	1	1	1	0	0	1	0	1	1	1	1	0		0	0	1	1	0		1	1	0	1	2	1			1		0	0	0	1
	0	56	0	0	0	0	19.84	0	1.7	0	81	0	0	0	0	0	1	1	0	1	1	0	1	0	1	0	0	1		0	1	0	0	1		0	0	1	1	2	0			0		0	0	0	0
	0	63	1	0	1	1	20.75	0	5.8	0	99	0	1	0	0	0	0	0	0	1	1	0	1	0	0	0	0	1		0	0	0	0	1		0	0	0	1	2	0			0		0	0	0	0
	0	69	1	1	0	0	23.46	0	5.3	0	35	0	0	0	0	0	0	1	1	0	0	1	0	0	0	0	1	0		0	0	0	1	0		0	1	0	1	2	0			0		0	0	0	0
	0	48	0	0	0	0	26.32	0	1.4	0	66	0	0	0	0	0	0	0	0	0	0	0	0	0	0	0	0	0		0	0	0	0	0		0	0	0	1	2	0			0		0	0	0	0
	0	60	1	0	0	0	19.69	0	3.9	0	119	1	0	1	0	1	0	0	0	0	0	0	0	1	0	0	0	0		0	0	0	0	0		0	0	0	1	2	0			0		0	0	1	0
	0	37	0	0	0	0	29.42	1	8.2	0	30	0	0	0	0	0	0	0	0	0	0	0	0	0	0	0	0	0		0	0	0	0	0		0	0	0	1	2	0			0		0	0	0	0
	0	51	0	1	1	1	20.01	0	5.7	0	86	0	0	0	0	0	0	0	1	0	0	1	0	0	0	0	1	0		1	0	0	1	0		0	1	0	1	2	0			0		0	0	0	0
	0	62	1	1	0	0	25.68	0	6.4	0	77	0	1	0	0	0	0	0	1	0	0	1	0	0	0	0	1	0		0	0	1	0	0		1	0	0	1	2	0			0		0	0	0	0
	0	69	1	0	0	0	17.28	0	3	0	30	0	0	0	0	1	0	0	0	0	0	0	0	1	0	0	0	0		0	0	0	0	0		0	0	0	1	2	0			0		0	0	0	1
	0	66	1	1	1	0	16.31	0	5.1	0	27	0	1	0	0	1	0	0	0	1	1	0	1	1	0	0	0	1		1	0	0	0	1		0	0	1	1	2	0			0		0	0	0	0
	0	50	0	0	0	1	19.06	0	6.7	0	95	0	0	0	0	0	0	0	0	0	0	0	0	0	0	0	0	0		0	0	0	0	0		0	0	0	1	2	0			0		1	0	0	0
	0	65	1	0	0	0	22.38	0	8.3	0	62	0	1	0	0	0	0	0	0	0	0	0	0	0	0	0	0	0		0	0	0	0	0		0	0	0	1	2	0			0		0	0	1	0
	0	45	0	0	0	0	27.36	0	5.3	0	58	0	0	0	0	1	0	0	0	1	0	0	1	1	0	0	0	1		0	0	0	0	1		0	0	1	1	2	0			0		0	0	0	0
	0	53	0	1	0	0	24.41	0	9.1	0	38	0	1	0	0	0	0	0	0	0	0	0	0	0	0	0	0	0		1	0	0	0	0		0	0	0	1	2	0			1		1	0	0	0
	0	79	1	1	0	0	24.15	0	5.3	0	34	0	0	1	0	0	0	0	0	0	0	0	0	0	0	0	0	0		1	0	0	0	0		0	0	0	1	2	0			0		0	0	0	0
	0	60	1	0	1	1	23.58	0	8.2	0	24	0	1	0	0	1	0	1	1	0	0	1	0	1	0	1	1	0		0	0	1	0	0		0	0	0	1	2	0			0		0	0	0	0
	0	52	0	0	0	0	19.46	0	6.5	0	64	0	0	0	0	0	0	0	0	1	1	0	1	0	0	0	0	1		0	0	0	0	1		1	0	1	1	2	1			1		0	0	0	0
	0	56	0	1	0	0	28.01	1	3.2	0	39	0	0	0	0	0	0	0	0	1	1	0	1	0	0	0	0	1		0	0	0	0	1		0	0	1	1	2	0			0		1	1	0	0
	0	57	0	0	0	0	23.41	0	5.3	0	84	0	0	1	0	0	0	1	1	0	0	1	0	0	0	1	1	0		0	0	1	1	0		1	0	0	1	2	1			0		0	0	0	0
	0	70	1	1	0	0	26.53	0	4.8	0	63	0	0	1	0	0	0	0	0	0	0	0	0	0	0	0	0	0		0	0	0	0	0		0	1	0	1	2	0			0		0	0	0	0
	0	78	1	0	0	0	24.32	0	1.9	0	48	0	1	0	0	1	0	0	0	0	0	0	0	1	0	0	0	0		0	0	0	0	0		0	0	0	1	2	0			0		0	0	0	0
	0	42	0	0	0	1	26.17	0	3.4	0	49	0	0	0	0	0	0	0	0	0	0	0	0	0	0	0	0	0		0	0	0	0	0		0	0	0	1	2	0			0		0	0	0	0
	0	65	1	0	0	0	27.81	0	5.1	0	20	0	0	0	0	0	0	1	1	0	0	1	0	0	0	1	1	0		1	0	0	0	0		0	0	0	1	2	0			0		0	0	0	0
	0	38	0	0	0	0	23.41	0	3.2	0	59	0	0	0	0	0	0	1	1	1	1	1	1	0	0	1	1	1		0	0	0	0	1		0	0	1	1	2	0			0		0	0	0	0
	0	61	1	1	0	0	26.31	0	10	0	47	0	1	0	0	0	0	0	0	0	0	0	0	0	0	0	0	0		0	0	0	0	0		1	0	0	1	2	0			0		0	0	0	0
	0	62	1	0	0	1	26.47	0	2.5	0	59	0	0	0	0	1	0	1	1	0	0	1	0	1	0	1	1	0		1	0	1	1	0		0	1	0	1	2	0			0		1	0	0	1
	0	39	0	0	0	0	21.3	0	3.6	0	57	0	1	1	0	0	0	0	0	1	1	0	1	0	0	0	0	1		0	0	0	0	1		0	0	1	1	2	0			0		0	0	0	0
	0	72	1	1	0	1	23.5	0	9.1	0	39	0	0	0	0	0	0	0	0	0	0	0	0	0	0	0	0	0		0	1	0	0	0		0	0	0	1	2	0			0		0	0	0	0
	0	28	0	0	0	0	22.67	0	3.6	0	58	0	0	0	0	0	0	0	0	0	0	0	0	0	0	0	0	0		0	0	0	0	0		1	1	0	1	2	1			1		1	0	0	0
	0	77	1	0	0	0	20.91	0	4.6	0	25	0	0	0	0	0	0	0	0	0	0	0	0	0	0	0	0	0		1	0	0	0	0		0	0	0	1	2	0			0		0	0	0	0
	0	31	0	1	0	1	26.78	0	2.6	0	14	0	0	0	0	1	0	1	1	0	0	1	0	1	0	1	1	0		1	0	1	1	0		1	1	0	1	2	1			1		0	0	0	1
	0	34	0	0	0	1	17.8	0	7.4	0	20	0	1	1	0	1	0	0	0	1	1	0	1	1	0	0	0	1		0	0	0	0	1		0	0	0	1	2	0			0		1	0	0	1
	0	76	1	0	0	0	18.9	0	3.2	0	83	0	0	0	0	0	0	0	0	0	0	0	0	0	0	0	0	0		1	0	0	0	0		0	0	0	1	2	0			0		0	0	0	0
	0	54	0	0	0	1	20.13	0	4.8	0	57	0	0	0	0	0	1	1	1	0	0	1	0	0	1	1	1	0		0	1	1	1	0		1	1	0	1	2	0			0		0	0	0	0
	0	37	0	1	0	0	27.87	0	9.1	0	21	0	0	0	0	1	1	1	1	0	0	1	0	1	1	1	1	0		0	1	1	1	0		1	1	0	1	2	0			0		0	0	0	0
	0	49	0	0	0	1	19.27	0	5.3	0	53	0	0	0	0	0	0	0	0	0	0	0	0	0	0	0	0	0		0	0	0	0	0		0	0	0	1	2	0			0		0	0	0	0
	0	70	1	0	0	0	26.52	0	9.1	0	30	0	0	0	0	0	0	1	1	1	1	1	1	0	0	1	1	1		0	0	1	1	1		0	1	1	1	2	0			0		1	0	1	0
	0	50	0	0	0	1	26.53	0	3.6	0	95	0	0	0	0	1	0	0	0	0	0	0	0	1	0	0	0	0		1	0	0	0	0		0	0	0	1	2	0			0		0	0	0	1
	0	52	0	1	0	0	24.51	0	4.6	0	55	0	0	0	0	0	0	0	0	0	0	0	0	0	0	0	0	0		0	0	0	0	0		0	0	0	1	2	0			0		0	0	0	0
	0	72	1	0	0	1	26.31	0	5.3	0	49	0	0	1	0	0	0	0	0	0	0	0	0	0	0	0	0	0		0	0	0	0	0		0	0	0	1	2	0			0		0	0	0	0
	0	43	0	0	0	0	27.36	0	1.4	0	11	0	0	0	0	0	0	0	0	0	0	0	0	0	0	0	0	0		1	0	0	0	0		0	0	0	1	2	0			0		1	1	0	0
	0	53	0	0	0	1	22.43	0	3.9	0	32	0	0	0	0	0	0	1	1	0	0	1	0	0	0	1	1	0		1	0	0	1	0		0	1	1	1	2	0			0		0	0	0	0
	0	55	0	1	0	0	21.3	0	5.6	0	30	0	0	1	0	1	0	0	0	1	1	0	1	1	0	0	0	1		0	1	0	0	1		1	0	1	1	2	0			0		0	0	0	0
	0	71	1	0	0	1	19.81	0	2.7	0	42	0	1	0	0	0	0	0	0	1	1	0	1	0	0	0	0	1		1	0	0	0	1		0	0	0	1	2	0			0		0	0	0	0
	0	59	0	1	0	0	18.75	0	10.1	0	30	0	0	0	0	0	0	0	0	0	0	0	0	0	0	0	0	0		0	0	0	0	0		0	0	0	1	2	0			0		0	0	0	0
	0	41	0	0	0	1	20.15	0	3.2	0	53	0	0	0	0	0	0	1	1	0	0	1	0	0	0	1	1	0		0	0	1	1	0		1	1	0	1	2	0			0		0	0	1	0
	0	48	0	0	0	0	22.34	0	9.5	0	21	0	0	1	0	0	0	0	0	0	0	0	0	0	0	0	0	0		0	0	0	0	0		0	0	0	1	2	0			0		0	1	0	1
	0	54	0	0	0	0	24.17	0	12.8	1	33	0	0	0	0	1	0	0	0	1	1	0	1	1	0	0	0	1		0	1	0	0	1		0	0	1	1	2	0			0		0	0	0	1
	0	79	1	1	0	1	21.78	0	9.5	0	66	0	0	0	0	0	0	0	0	0	0	0	0	0	0	0	0	0		1	0	0	0	0		0	0	0	1	2	0			0		0	0	0	0
	0	53	0	0	0	0	24.61	0	5.3	0	43	0	0	0	0	0	0	0	1	0	0	1	0	0	0	0	1	0		0	0	0	1	0		0	1	1	1	2	0			0		0	0	0	0
	0	52	0	0	0	0	24.58	0	8.2	0	20	0	1	0	0	0	0	0	0	0	0	0	0	0	0	0	0	0		0	0	0	0	0		0	0	0	1	2	0			0		0	0	0	0
	0	43	0	0	0	1	26.18	0	6.5	0	39	0	0	0	0	0	0	0	0	0	0	0	0	0	0	0	0	0		0	0	0	0	0		0	0	0	1	2	0			0		0	0	0	0
	0	63	1	0	0	1	23.49	0	5.1	0	48	0	0	1	0	1	0	0	0	0	0	0	0	1	0	0	0	0		1	1	0	0	0		0	0	0	1	2	0			0		0	0	0	1
	0	39	0	0	0	0	27.18	0	5.3	0	42	0	0	0	0	0	0	0	0	0	0	0	0	0	0	0	0	0		0	0	0	0	0		0	0	0	1	2	0			0		1	0	1	0
	0	32	0	0	0	0	24.19	0	4.8	0	10	0	0	0	0	0	0	0	0	0	0	0	0	0	0	0	0	0		0	0	0	0	0		0	0	0	1	2	0			0		0	0	0	0
	0	30	0	0	0	1	25.62	0	3.1	0	56	0	0	0	0	0	0	1	1	0	0	1	0	0	0	1	1	0		0	0	1	1	0		1	1	0	1	2	0			0		0	0	0	0
	0	67	1	0	0	0	21.34	0	3.4	0	42	0	0	0	0	0	0	0	0	0	0	0	0	0	0	0	0	0		1	0	0	0	0		0	0	0	1	2	0			0		0	0	0	0
	0	20	0	0	0	1	27.83	0	5.1	0	43	0	0	0	0	1	0	0	0	1	1	0	1	1	0	0	0	1		0	0	0	0	1		0	0	0	1	2	0			0		0	0	0	1
	0	61	1	0	0	0	20.06	0	3.2	0	70	0	0	0	0	0	0	0	0	0	0	0	0	0	0	0	0	0		0	0	0	0	0		0	0	0	1	2	0			0		0	0	0	0
	0	21	0	1	0	0	28.63	0	4.2	0	34	0	0	0	0	0	0	0	0	0	0	0	0	0	0	0	0	0		0	0	0	0	0		0	0	0	1	2	0			0		0	0	0	0
	0	65	1	1	1	1	27.81	0	7.3	0	60	0	0	0	0	0	0	0	0	1	1	1	1	0	0	0	0	0	7.42	0	1	0	0	0		1	0	0	0		0			0		0	1	1	0
	0	60	1	0	1	1	25.71	0	2.9	0	21	0	0	0	0	0	0	0	0	1	0	0	1	0	0	0	0	0	4.88	1	1	0	0	0		0	0	0	0		0			0		0	0	0	0
	0	56	0	0	0	0	25.37	0	5.3	0	20	0	0	0	0	1	0	0	0	1	1	0	1	1	0	1	0	1	5.44	0	0	0	0	0		0	0	0	0		0			0		0	1	0	0
	0	78	1	1	1	1	26.88	0	1.4	0	19	0	0	0	0	0	0	0	0	1	0	1	0	1	0	1	0	0	4.27	0	1	0	0	0		0	0	0	0		0			0		0	1	0	0
	0	48	0	0	1	1	21.34	0	6.2	0	15	0	0	0	0	0	0	0	0	0	1	1	1	1	0	1	0	0	6.44	0	0	0	0	0		0	0	0	0		0			0		0	0	0	0
	0	47	0	1	0	0	25.23	0	6.5	0	38	0	0	0	0	1	0	0	0	0	0	0	1	1	0	0	0	0	4.71	0	0	0	0	0		0	1	0	0		0			0		0	0	0	0
	0	57	0	0	0	0	19.46	0	3.2	0	22	0	0	0	0	1	0	1	1	0	0	0	1	0	0	0	0	0	4.7	1	0	0	0	0		0	1	0	0		1			0		0	1	0	0
	0	69	1	1	0	0	20.91	0	9	0	37	0	0	0	0	0	0	1	0	0	0	0	1	1	0	0	0	0	0	0	0	0	0	0		0	0	0	0		0			0		0	1	0	0
	0	78	1	1	1	1	23.27	0	7	0	50	0	0	0	0	0	0	0	0	1	0	0	0	0	0	0	0	0		0	0	0	0	0		1	0	0	1		0			0		0	0	0	0
	0	79	1	0	0	0	25.84	0	9.3	0	39	0	0	0	0	0	0	0	0	0	1	1	0	0	0	0	0	0		0	0	0	0	0		0	0	0	0		0			0		0	1	0	0
	0	76	1	0	0	1	30.23	1	3	0	42	0	0	0	0	0	0	0	0	0	0	0	0	0	0	0	0	0		0	0	0	0	0		0	0	0	0		0			0		0	0	0	0
	0	51	0	1	1	0	25.7	0	9	0	46	0	0	0	0	1	1	1	1	0	0	0	1	0	0	1	1	0		1	0	0	0	1		1	0	0	0		0			0		0	1	1	0
	0	63	1	0	0	1	23.45	0	3.4	0	71	0	0	0	0	1	0	0	0	0	0	0	0	0	1	0	1	0		1	0	0	0	0		1	0	0	0		0			0		0	0	0	1
	0	43	0	0	0	0	26.73	0	5.3	0	30	0	0	0	0	0	0	0	0	0	0	0	0	0	1	0	0	0		0	0	1	0	0		0	0	1	0		0			1		0	0	0	0
	0	60	1	0	0	0	19.04	0	3.2	0	58	0	0	0	0	0	1	0	1	0	0	0	0	0	0	0	1	1		0	0	0	0	0		0	0	0	0		0			0		0	0	0	0
	0	32	0	1	0	1	17.75	0	4.8	0	39	0	0	0	0	0	0	1	0	0	0	0	0	0	1	0	1	1		1	0	0	0	0		1	0	0	0		0			0		0	0	0	1
	0	58	0	1	0	0	24.57	0	7.3	0	20	0	0	0	0	0	0	0	0	0	0	0	0	0	0	0	1	0		0	0	0	0	0		0	0	0	0		0			0		0	0	0	0
	0	59	0	0	1	0	21.98	0	2.5	0	54	0	0	0	0	1	1	1	1	0	0	0	0	0	0	0	1	1		0	0	0	1	0		0	0	0	0		0			0		0	0	0	0
	0	31	0	1	0	0	23.55	0	3.6	0	79	0	0	0	0	0	0	0	1	0	0	0	0	0	1	0	0	1		0	0	0	0	0		0	1	0	0		0			0		0	1	0	0
	0	46	0	0	0	0	27.83	0	9.1	0	10	0	0	0	0	0	0	0	0	0	0	0	0	0	0	1	1	0		0	0	0	0	0		0	0	0	0		0			0		0	0	0	0
	0	67	1	1	0	0	25.6	0	8.2	0	46	0	0	0	0	0	1	1	1	0	0	0	0	0	0	0	1	1		0	0	0	1	0		0	0	0	0		0			0		0	0	0	0
	0	28	0	0	0	0	24.31	0	4.6	0	40	0	0	0	0	1	0	0	0	0	0	0	1	0	0	1	0	0		0	0	0	0	0		0	0	0	0		0			0		0	0	0	0
	0	68	1	0	0	0	26.36	0	12.5	1	38	0	0	0	0	0	1	1	1	0	0	0	0	0	0	0	0	0		0	0	1	0	0		1	0	1	0		1			1		0	0	0	0
	0	70	1	0	0	1	25.63	0	3.2	0	20	0	0	0	0	1	0	0	0	0	0	0	0	0	1	1	1	0		0	0	0	0	0		0	0	0	0		0			0		0	0	0	1
	0	30	0	1	0	0	24.23	0	5.3	0	59	0	0	0	0	0	0	0	0	0	0	1	0	0	1	0	0	0		1	0	0	0	0		1	0	0	0		0			1		0	1	0	0
	0	69	1	0	0	1	27.83	0	5.7	0	83	0	0	0	0	0	0	0	0	0	0	0	0	0	0	0	0	0		0	0	0	0	0		0	0	0	0		0			0		0	0	0	0
	0	59	0	0	0	0	24.35	0	1.9	0	29	0	0	0	0	1	0	0	1	0	0	0	1	0	1	0	0	0		0	1	0	0	0		0	0	0	0		0			0		0	0	0	0
	0	65	1	1	0	0	24.56	0	2.6	0	42	0	0	0	0	0	0	0	0	0	0	0	0	0	0	0	0	0		0	0	1	0	0		1	0	0	0		0			1		0	0	0	0
	0	46	0	0	1	0	27.17	0	5.1	0	107	1	0	0	0	1	0	1	0	0	0	0	0	0	0	0	0	1		0	0	0	1	1		0	0	0	0		0			0		0	0	0	0
	0	49	0	0	0	0	24.43	0	3.2	0	53	0	0	0	0	1	0	1	0	0	0	0	0	0	0	0	0	1		1	0	0	1	0		0	1	0	0		0			0		0	0	0	0
	0	78	1	1	0	0	19.36	0	10	0	66	0	0	0	1	0	0	0	0	0	0	0	0	0	0	1	0	0		0	0	0	0	0		0	0	0	0		1			0		0	0	0	0
	0	38	0	0	1	0	17.83	0	7.4	0	30	0	0	0	0	1	0	1	0	0	0	0	1	0	0	1	1	1		0	1	0	0	0		0	0	0	0		0			0		0	0	0	0
	0	62	1	0	0	1	20.34	0	3.2	0	29	0	0	0	0	0	0	0	1	0	0	0	0	0	0	0	0	0		0	0	0	0	0		0	1	0	0		0			0		0	0	0	1
	0	35	0	1	0	1	26.83	0	4.8	0	48	0	0	0	0	0	0	0	0	0	0	0	0	0	0	1	0	0		0	0	1	0	0		0	0	0	0		0			0		0	0	0	1
	0	74	1	0	0	0	25.06	0	9.1	0	10	0	0	0	0	0	1	0	0	0	0	0	0	0	0	0	0	0		0	0	1	0	1		0	0	0	0		0			0		0	0	0	0
	0	36	0	1	0	0	18.79	0	5.3	0	23	0	0	0	0	1	0	0	0	0	0	0	0	0	0	0	0	0		1	0	0	0	1		1	0	0	0		0			0		0	0	0	0
	0	69	1	0	0	1	19.34	0	7.8	0	56	0	0	0	0	0	1	0	1	0	0	0	0	0	0	0	0	0		0	0	1	0	0		1	0	1	0		0			0		0	0	0	1
	0	40	0	1	0	1	19.03	0	3.6	0	42	0	0	0	0	1	0	1	0	0	0	1	0	0	0	0	0	0		0	0	0	0	1		0	0	0	0		0			0		0	0	0	0
	0	63	1	0	0	0	18.47	0	4.6	0	46	0	0	0	0	0	0	1	0	0	0	0	0	0	0	0	0	0		0	0	0	0	0		1	0	0	0		0			0		0	0	0	0
	0	52	0	0	1	0	20.9	0	2.1	0	71	0	0	0	0	0	0	0	1	0	0	0	1	0	0	0	0	0		0	0	0	0	1		0	1	0	0		0			0		0	0	0	0
	0	59	0	0	0	0	29.85	1	1.4	0	30	0	0	0	0	1	1	0	0	0	0	0	0	0	0	0	0	0		0	0	0	0	0		0	0	0	0		0			0		0	0	0	0
	0	78	1	1	0	0	25.49	0	3.9	0	29	0	0	0	0	0	0	0	1	0	0	0	0	1	0	1	1	0		0	0	0	0	0		0	0	0	0		0			0		0	1	0	0
	0	53	0	0	0	0	23.64	0	9.4	0	88	0	0	0	0	0	1	0	0	0	0	0	0	0	0	1	1	0		0	0	0	0	0		0	0	0	0		1			0		0	0	0	0
	0	72	1	0	0	0	30.16	1	3.2	0	10	0	0	0	0	0	0	1	1	0	0	0	0	0	0	0	0	0		0	0	0	0	0		0	0	0	0		0			0		1	0	0	0
	0	71	1	1	0	1	20.7	0	9.9	0	54	0	0	0	0	1	1	0	0	1	0	0	0	1	0	1	0	1		1	1	1	1	0		0	1	0	0		0			0		0	0	0	1
	0	47	0	1	1	0	24.68	0	5.1	0	28	0	0	0	0	0	0	0	0	0	0	0	1	0	0	0	0	0		0	1	0	0	1		0	1	0	0		0			0		0	0	0	0
	0	79	1	0	0	0	25.37	0	5.1	0	10	0	0	0	0	0	0	1	1	0	0	0	0	0	1	0	0	0		0	0	0	0	1		0	0	0	0		0			0		0	0	0	0
	0	33	0	0	0	0	21.47	0	3.2	0	46	0	0	0	0	1	1	0	0	0	0	1	0	0	1	0	1	1		0	1	0	1	0		0	0	0	0		0			0		0	0	0	0
	0	67	1	0	1	0	21.35	0	10	0	40	0	0	0	0	0	0	0	0	0	0	0	0	0	0	0	1	0		0	0	0	0	0		0	0	0	0		0			0		0	0	0	0
	0	35	0	0	1	0	27.27	0	7.4	0	81	0	0	0	0	1	0	0	0	0	0	0	0	0	1	0	0	0		1	0	0	0	0		0	0	0	0		0			0		0	0	1	0
	0	60	1	0	0	0	24.36	0	3.2	0	99	0	0	0	0	0	0	0	0	1	0	0	0	1	0	0	1	0		0	0	0	0	0		0	0	0	0		0			0		0	0	0	0
	0	22	0	0	0	0	25.18	0	3.6	0	35	0	0	0	0	0	1	1	1	0	0	0	0	0	0	0	0	1		0	0	0	1	0		1	0	0	0		0			0		0	0	0	0
	0	26	0	1	0	0	19.74	0	4.6	0	66	0	0	0	0	1	1	0	0	0	0	0	0	0	0	0	0	1		0	0	0	1	0		0	0	0	0		0			0		0	0	0	0
	0	28	0	0	0	1	18.29	0	1	0	21	0	0	0	0	0	0	0	0	0	0	1	1	0	0	0	0	0		1	0	0	0	0		0	0	0	0		0			0		0	0	0	1
	0	30	0	1	0	0	20.07	0	5.3	0	30	0	0	0	0	1	1	1	0	0	0	0	0	0	0	0	0	0		1	0	0	0	1		1	0	0	0		0			0		0	0	0	0
	0	67	1	1	0	0	24.73	0	3.3	0	20	0	0	0	0	0	0	0	1	0	0	0	0	0	1	0	0	0		0	0	0	0	1		0	0	0	0		0			0		1	0	0	0
	0	62	1	0	1	0	25.68	0	1.9	0	31	0	0	0	0	1	0	0	0	0	0	0	0	0	0	0	0	0		0	0	0	0	0		0	0	0	0		0			0		0	0	1	0
	0	29	0	1	0	0	20.98	0	2.6	0	39	0	0	0	0	0	0	0	0	0	0	0	0	0	1	1	0	0		1	0	0	0	1		0	0	0	0		1			0		0	0	0	0
	0	71	1	0	0	0	24.88	0	4.2	0	40	0	0	0	0	0	1	0	0	0	0	0	0	0	1	0	1	0		0	0	0	0	0		1	0	0	0		0			1		1	0	0	0
	0	46	0	1	1	0	25.62	0	3.2	0	128	1	0	0	0	1	1	0	0	0	0	0	0	0	0	0	1	0		0	0	0	0	0		1	0	0	0		0			0		0	0	0	0
	0	78	1	0	0	0	24.41	0	10	0	56	0	0	0	0	1	0	1	1	0	0	0	0	0	1	1	0	1		1	0	0	1	0		0	0	0	0		1			0		0	0	0	0
	0	43	0	0	0	0	29.06	1	7.4	0	58	0	0	0	0	0	0	0	0	0	0	0	1	0	0	0	0	0		0	0	0	0	1		0	0	0	0		0			1		0	0	0	0
	0	74	1	1	1	0	23.41	0	2.5	0	86	0	0	0	0	0	1	0	0	1	0	0	0	1	0	0	0	0		0	0	0	0	1		0	0	0	0		0			0		1	1	0	0
	0	49	0	0	0	1	24.67	0	3.6	0	77	0	0	0	0	0	0	0	0	0	0	0	0	0	0	0	0	1		0	0	1	1	0		0	0	0	0		0			0		0	0	0	0
	0	23	0	0	0	0	23.56	0	9.1	0	30	0	0	0	0	1	1	0	0	0	0	0	0	0	0	0	0	0		0	0	0	0	0		0	0	0	0		1			0		0	0	0	0
	0	75	1	0	0	0	30.03	1	4.8	0	27	0	0	0	0	1	0	0	0	0	0	0	0	0	0	1	0	0		1	0	0	0	0		0	0	0	0		0			0		0	0	0	0
	0	28	0	1	0	1	24.57	0	2.3	0	95	0	0	0	0	0	0	0	1	0	0	0	1	0	0	0	0	0		0	1	0	0	0		0	0	0	0		0			0		0	0	0	0
	0	27	0	0	0	0	24.48	0	2.6	0	62	0	0	0	1	0	0	0	0	0	0	0	0	0	0	0	1	1		0	0	1	1	0		1	0	0	0		0			0		0	0	0	0
	0	57	0	0	0	0	20.59	0	7.4	0	58	0	0	0	0	0	0	0	0	0	0	0	0	0	0	0	0	1		0	0	0	1	1		0	0	0	0		0			0		0	0	0	0
	0	77	1	0	0	0	26.78	0	3.2	0	38	0	0	0	0	1	1	0	0	0	0	0	0	0	0	0	0	0		0	0	0	0	0		0	0	0	0		0			0		0	0	0	0
	0	70	1	1	1	1	21.34	0	4.8	0	65	0	0	0	0	1	0	0	1	0	0	0	0	0	0	0	1	1		1	0	1	1	0		1	0	0	0		0			0		1	0	0	1
	0	59	0	0	0	0	26.91	0	5.5	0	33	0	0	0	0	0	0	0	0	0	0	0	0	0	0	0	0	0		0	0	0	0	1		0	0	0	0		0			0		0	0	0	0
	0	55	0	0	0	0	23.46	0	10	0	20	0	0	0	0	0	1	0	1	0	0	0	1	0	0	0	0	0		0	0	0	0	0		0	1	0	0		0			0		0	0	0	0
	0	79	1	1	0	0	20.07	0	4.2	0	39	0	0	0	0	0	0	0	0	0	0	0	0	0	1	1	0	0		0	0	0	0	0		0	0	0	0		0			1		1	0	0	0
	0	63	1	0	0	0	26.79	0	2.9	0	39	0	0	0	0	1	0	0	0	0	0	0	0	0	0	0	1	0		0	0	0	0	0		1	0	0	0		0			0		0	0	0	0
	0	48	0	0	0	1	21.05	0	8.6	0	21	0	0	0	0	0	1	0	1	0	0	0	0	0	0	0	1	1		1	0	0	1	0		1	0	0	0		0			1		0	0	0	0
	0	65	1	0	0	1	24.67	0	3.2	0	48	0	0	0	0	0	0	0	1	0	0	0	0	0	1	1	0	0		1	0	0	0	1		0	0	0	0		0			0		0	1	0	1
	0	32	0	0	1	0	24.53	0	8.3	0	49	0	0	0	0	1	0	0	0	0	0	0	0	0	0	0	0	0		0	0	0	0	0		1	0	0	0		0			0		0	0	0	0
	0	36	0	0	0	0	20.14	0	6.5	0	20	0	0	0	0	0	0	0	1	0	0	0	0	0	0	0	0	1		0	1	1	1	0		0	1	1	0		0			0		0	0	0	0
	0	67	1	0	0	0	27.8	0	2.1	0	59	0	0	0	0	0	1	0	0	0	0	0	0	0	1	0	0	1		1	1	1	1	0		0	1	0	0		0			0		0	0	0	0
	0	39	0	0	0	0	26.82	0	9.1	0	47	0	0	0	0	0	0	0	1	0	0	0	0	0	1	1	0	0		0	0	0	0	0		0	0	0	0		0			0		0	0	0	0
	0	69	1	1	1	0	24.36	0	1	0	59	0	0	0	0	1	0	0	0	0	0	0	0	0	1	1	0	1		0	0	1	1	1		0	0	0	0		0			0		1	0	1	0
	0	29	0	0	0	1	24.16	0	5.3	0	60	0	0	1	1	0	0	0	1	0	0	0	0	1	0	0	0	0		1	0	0	0	0		1	0	0	0		0			0		0	0	0	1
	0	62	1	0	0	0	24.52	0	2.1	0	34	0	0	0	0	0	1	0	0	0	0	0	0	0	1	1	0	0		0	0	0	0	0		0	0	0	0		0			0		0	0	0	0
	0	75	1	0	0	0	20.15	0	1.8	0	51	0	0	0	0	1	0	0	1	0	0	0	0	0	0	0	1	0		0	0	0	0	0		0	0	0	0		0			0		1	0	0	0
	0	64	1	1	0	0	24.38	0	2.6	0	20	0	0	0	0	0	0	0	0	0	0	0	0	0	0	0	0	0		0	0	0	0	0		1	0	0	0		0			0		0	1	0	0
	0	25	0	0	1	0	20.48	0	5.3	0	54	0	0	0	0	0	0	0	1	0	0	0	0	0	0	0	0	1		0	0	1	1	0		1	0	0	0		0			0		0	1	0	0
	0	68	1	0	0	0	24.37	0	9.1	0	98	0	0	0	0	0	1	0	0	0	0	0	0	0	0	0	0	0		1	0	0	0	1		0	1	0	0		0			0		0	0	0	0
	0	70	1	0	0	0	26.4	0	6.7	0	36	0	0	0	0	1	0	0	1	0	0	0	0	0	1	1	0	0		0	0	0	0	1		1	0	0	0		1			0		1	0	0	0
	0	27	0	0	0	0	25.43	0	8.2	0	42	0	0	0	0	0	1	0	0	0	0	0	0	0	0	0	1	0		0	0	0	0	0		0	0	0	0		0			0		0	0	1	0
	0	72	1	0	1	0	23.56	0	6.5	0	99	0	0	1	1	0	0	0	1	0	0	0	0	1	0	0	0	1		0	0	1	1	0		0	0	1	0		0			0		0	0	1	0
	0	74	1	1	0	1	29.08	1	2.1	0	91	0	0	0	0	0	0	0	0	0	0	0	0	0	1	1	0	0		0	0	0	0	0		0	0	0	0		1			0		0	0	0	0
	0	79	1	0	0	1	24.38	0	8	0	20	0	0	0	0	0	0	0	0	0	0	0	0	0	1	0	0	0		1	0	0	0	1		0	1	0	0		0			0		0	0	0	0
	0	29	0	0	0	0	22.45	0	4.8	0	52	0	0	0	0	1	1	0	1	0	0	0	0	1	0	0	0	0		0	0	0	0	0		1	0	0	0		0			0		0	0	0	0
	0	73	1	0	0	0	27.83	0	1.9	0	64	0	0	0	0	0	0	0	0	0	0	0	0	0	1	1	1	1		0	0	0	1	0		0	0	0	0		0			0		0	0	0	0
	0	20	0	0	0	0	24.5	0	3.4	0	39	0	0	0	0	0	0	0	0	0	0	0	0	0	0	0	0	0		0	0	0	0	0		0	0	0	0		0			0		0	0	0	0
	0	75	1	0	0	0	24.4	0	5.1	0	48	0	0	0	0	0	0	0	1	0	0	0	0	0	0	0	0	0		0	0	0	0	0		0	0	0	0		0			0		0	0	0	0
	0	58	0	0	0	1	30.12	1	4	0	42	0	0	0	0	1	0	0	1	0	0	0	0	0	0	0	0	0		1	0	0	0	0		1	1	0	0		0			0		0	0	0	1
	0	69	1	0	1	0	26.18	0	10	0	25	0	0	0	0	0	0	0	0	0	0	0	1	0	0	0	0	0		0	0	0	0	0		0	0	0	0		0			0		1	0	1	0
	0	43	0	0	0	0	20.36	0	2.3	0	19	0	0	0	0	0	0	0	0	0	0	0	0	1	1	1	0	0		0	0	0	0	0		0	0	0	0		0			1		0	0	0	0
	0	27	0	0	0	0	27.16	0	5.2	0	42	0	0	0	0	0	0	0	1	0	0	0	0	0	0	0	1	1		0	0	1	1	0		0	0	1	0		0			0		0	0	0	0
	0	60	1	0	0	0	23.41	0	1.7	0	42	0	0	0	0	1	0	0	0	0	0	0	0	0	0	0	1	0		0	0	0	0	0		1	0	0	0		0			0		0	0	0	0
	0	57	0	0	0	1	22.48	0	3.5	0	20	0	0	0	0	0	0	0	1	0	0	0	0	0	0	0	0	0		1	0	0	0	1		0	0	0	0		0			0		0	0	0	1
	0	46	0	1	0	0	20.97	0	9	0	34	0	0	0	0	1	0	0	0	0	0	0	0	0	1	0	0	0		0	0	0	0	0		0	0	0	0		0			0		0	0	0	0
	0	63	1	0	0	0	23.09	0	11.7	1	60	0	0	0	0	0	1	0	0	0	0	0	0	0	0	0	0	0		0	0	0	0	0		0	0	0	0		0			0		0	0	0	0
	0	24	0	1	0	1	26.71	0	6.1	0	21	0	0	0	0	0	1	0	0	0	0	0	0	0	0	0	0	0		0	0	0	0	0		0	0	0	0		0			0		0	0	0	0
[truncated: 40 more columns]
